# Supplementary material for: Developing appropriate environmental enrichment strategies for broiler breeders
Source: Springer Nature journal article supplement (doi:10.1038/s41598-025-89691-w), 2025-03-21
Supplement: MOESM1 [file 41598_2025_89691_MOESM1_ESM.pdf]

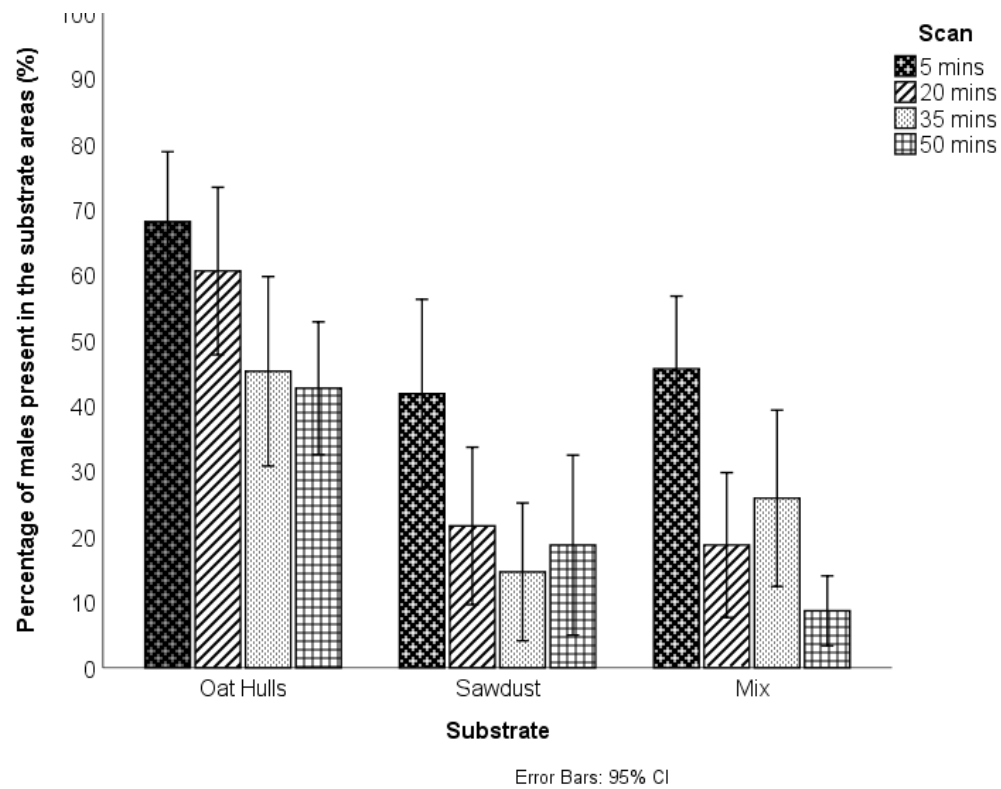

Supplementary Figure 1. The proportion of broiler breeders in the dustbathing area that are male over the focal period.
